# Supplementary material for: A ternary Rh complex catalyst highly active and stable in the hydrogenation of acrylonitrile–butadiene rubber
Source: Royal Society of Chemistry journal article supplement (doi:10.1039/c4nj01627k), 2014-12-23
Supplement: c4nj01627k1.pdf [file c4nj01627k1.pdf]

*New Journal of Chemistry*  
**Supporting Online Information**

**A Ternary Rh Complex Catalyst Highly Active and Stable in Hydrogenation of Acrylonitrile-Butadiene Rubber**

Peng Cao<sup>a</sup>, Meng Wu<sup>a</sup>, Rui Zou<sup>a</sup>, Liqun Zhang<sup>a,b</sup>, Dongmei Yue<sup>a,b\*</sup>

<sup>a</sup> State Key Laboratory of Organic-Inorganic Composites, Beijing University of Chemical Technology, Beijing 100029, China

<sup>b</sup> Key Laboratory of Beijing City on Preparation and Processing of Novel Polymer Materials, Beijing 100029, China

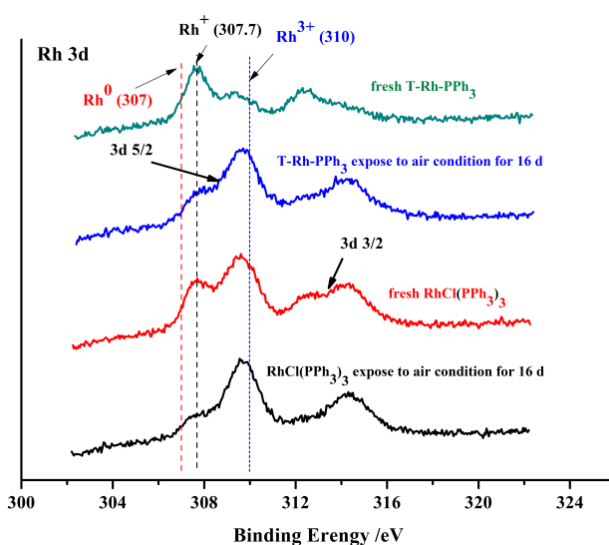

Fig. 1. X-ray photoelectron spectra of the Rh 3d region for various Rh catalysts.

The X-ray photoelectron spectra of the Rh 3d<sub>5/2</sub> of various Rh catalysts are shown in Fig. 1. The spectrum of Rh 3d<sub>5/2</sub> electrons for both catalysts was decomposed in two peaks: one at low binding energy centered at 307.7 eV and other at higher binding energy at 309.2-309.5 eV. Rh 3d<sub>5/2</sub> electrons with binding energy of 307.6-309.6 eV (mean: 308.8 eV) have been usually assigned to Rh<sup>+</sup> species<sup>1,2</sup>, while the component appearing at 308.8-311.3 eV (mean: 308.8 eV) can be associated with Rh<sup>3+</sup> species<sup>1,2</sup>. For fresh T-Rh-PPh<sub>3</sub>, the major signal of Rh 3d<sub>5/2</sub> was observed at 307.7 eV, which was identical with that of the value of the state of Rh<sup>+</sup>. However, spectra for fresh RhCl(PPh<sub>3</sub>)<sub>3</sub> shows two relatively sharp Rh 3d<sub>5/2</sub> peaks at binding energies of 307.7 and 309.3 eV, respectively. Compared with previous literature reports<sup>1,3,4</sup>, the Rh 3d<sub>5/2</sub> peaks for fresh RhCl(PPh<sub>3</sub>)<sub>3</sub> observed in the range of 307.7-309.3 eV can be assigned to cationic Rh<sup>δ+</sup> (δ~1) species. After exposing to air condition for 16 d, only a major signal of Rh 3d<sub>5/2</sub> for RhCl(PPh<sub>3</sub>)<sub>3</sub> was observed at 309.5 eV, indicating the few portion of

$\text{Rh}^+$  was oxidized. The similar spectrum was observed for T-Rh- $\text{PPh}_3$ . The reason for the indistinguishable difference in the Rh  $3d_{5/2}$  binding energies ( $\sim 309.5$  eV) for the two catalysts is that only a few  $\text{Rh}^+$  transferred to  $\text{Rh}^{3+}$  after a relatively short oxidation time of 16 d.

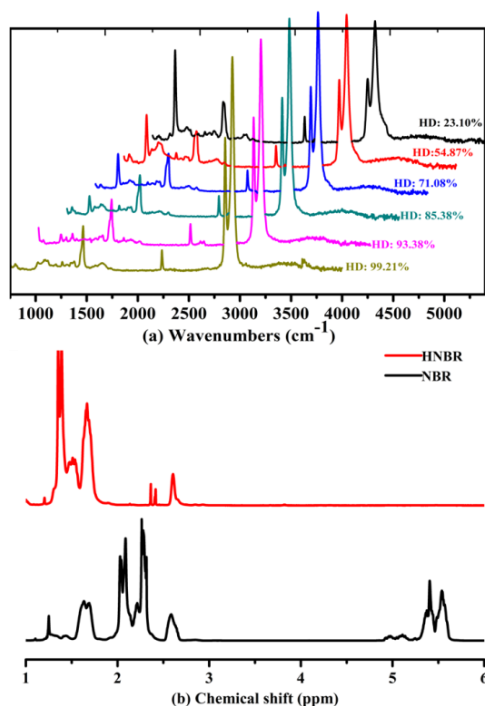

Fig. S2 (a) FTIR spectra of different degrees of hydrogenation of NBR, (b)  $^1\text{H}$ NMR spectra of NBR and HNBR

Fig. S2 (a) shows the FTIR spectra of HNBR samples with different degrees of hydrogenation. The main peaks are at  $2237\text{ cm}^{-1}$  (assigned to  $-\text{CN}$  stretching vibration),  $2928\text{ cm}^{-1}$  (assigned to  $-\text{CH}_2-$  symmetric stretching vibration),  $2857\text{ cm}^{-1}$  (assigned to  $-\text{CH}_2-$  asymmetric stretching vibration),  $1463\text{ cm}^{-1}$  (assigned to  $-\text{CH}_2-$  deformation vibration),  $968\text{ cm}^{-1}$  (assigned to  $-\text{CH}=\text{CH}-$  (1,4 cis- and trans-unit)), and  $724\text{ cm}^{-1}$  (assigned to  $-\text{CH}_2-$  vibration).

Fig. S2 (b) illustrates the  $^1\text{H}$ NMR spectra of HNBR and NBR. The main peaks are assigned as follows: 5.3-5.4 ppm ( $-\text{CH}=\text{CH}-$ , 1,4-cis and trans structural units); 2.5 ppm ( $-\text{CH}-\text{CN}$ , acrylonitrile structural units); 1.2-1.4 ppm ( $-\text{CH}_2-\text{CH}-$ , methylene structure unit); 1.5-1.6 ppm ( $-\text{CH}_2-$ , methylene structure); 0.8-0.9 ppm ( $-\text{CH}_3$ , methyl structure).

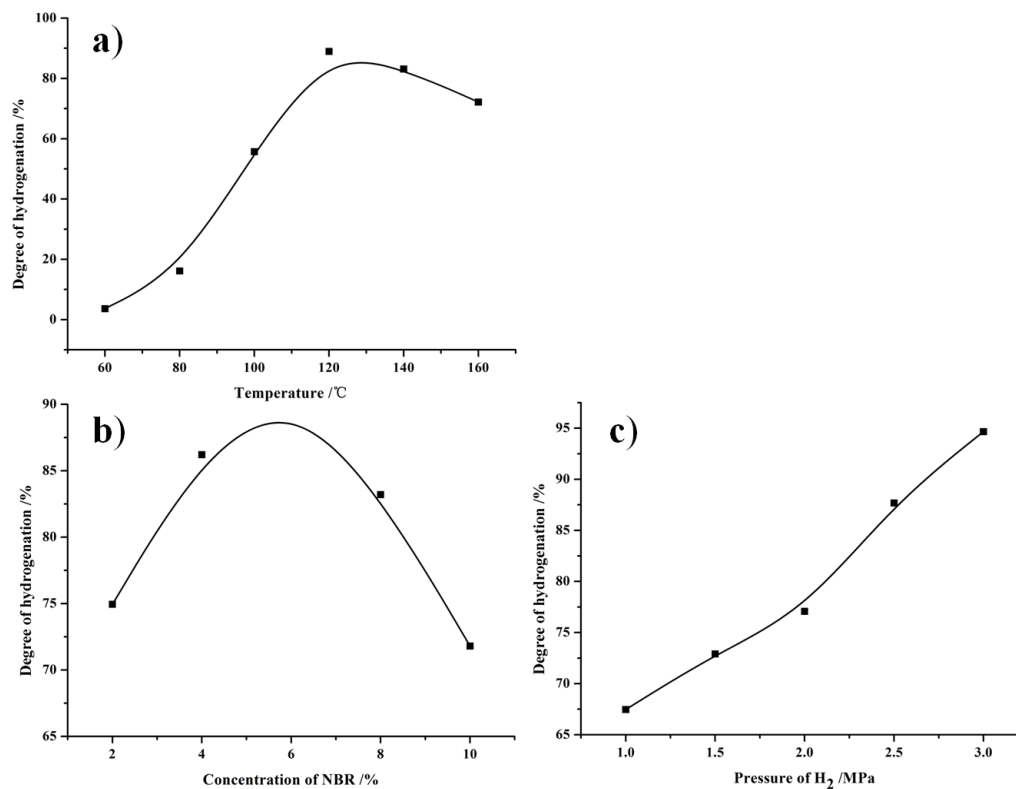

Fig. S3 Hydrogenation of NBR using catalyst of T-Rh-PPh<sub>3</sub>: (a) P<sub>H<sub>2</sub></sub>=2.5 MPa, W<sub>cat.</sub>/W<sub>NBR</sub>=0.1%, concentration of NBR=6%, t=8 h; (b) P<sub>H<sub>2</sub></sub>=2.5 MPa, W<sub>cat.</sub>/W<sub>NBR</sub>=0.1%, T=120 °C, t=8 h; (d) W<sub>cat.</sub>/W<sub>NBR</sub>=0.1%, concentration of NBR=6%, t=8 h, T=120 °C.

## References:

1. M. Kawai, M. Uda and M. Ichikawa, *The Journal of Physical Chemistry*, 1985, 89, 1654-1656.
2. M. A. Baltanas, J. H. Onuferko, S. T. McMillan and J. R. Katzer, *The Journal of Physical Chemistry*, 1987, 91, 3772-3774.
3. A. Karelovic and P. Ruiz, *Acs Catalysis*, 2013, 3, 2799-2812.
4. M. Machida, S. Minami, K. Ikeue, S. Hinokuma, Y. Nagao, T. Sato and Y. Nakahara, *Chemistry of Materials*, 2014, 26, 5799-5805.
